# Supplementary material
Source: ML conference proceedings conference paper supplement (https://openreview.net/forum?id=nmEt0ci8hi)
Supplement: supplementary_material [file attachment]

Welcome to the supplementary package of "*General Flow as Foundation Affordance for Scalable Robot Learning*" !

This document is intend to guide you through the rich resources available in this package. The resources included are:

|   |                                    |                                                                                                                                                                                            |
|---|------------------------------------|--------------------------------------------------------------------------------------------------------------------------------------------------------------------------------------------|
|   |                                    |                                                                                                                                                                                            |
| 1 | <b>README.pdf</b>                  | This document.                                                                                                                                                                             |
| 2 | <b>introduction_video.mp4</b>      | A 3-minute video gives a brief introduction of our project.                                                                                                                                |
| 3 | <b>project_cover.mp4</b>           | A conceptual video providing an intuitive understanding of this project.                                                                                                                   |
| 4 | <b>0.human_video_examples/</b>     | <b>24</b> examples of human videos used to extract 3D flow label.                                                                                                                          |
| 5 | <b>1.human_flow_visualization/</b> | <b>16</b> examples of 3D flow prediction in human video datasets.                                                                                                                          |
| 6 | <b>2.robot_flow_visualization/</b> | <b>18</b> visualizations of flow predictions in zero-shot executions. ( <i>1 for each task</i> )                                                                                           |
| 7 | <b>3.robot_demos/</b>              | <b>18</b> demonstration videos of robot executions. ( <i>1 for each task</i> )                                                                                                             |
| 8 | <b>4.robot_demos_diverse/</b>      | <b>54</b> demonstration videos, including the 18 from robot_demos/ plus an additional 27 videos, to showcase diverse experimental settings and robot behaviors. ( <i>3 for each task</i> ) |
| 9 | <b>5.robot_failure_cases/</b>      | <b>3</b> videos highlighting typical failure scenarios.                                                                                                                                    |
|   |                                    |                                                                                                                                                                                            |

Due to the anonymous submission policy, we have not organized these resources into web pages, but we plan to do so in the future. The videos have been compressed to meet the 100MB limit for supplementary materials, but clearer versions will be released later.

Have fun !
